# Supplementary material for: Polyethylenimine-functionalized graphene oxide as an efficient gene delivery vector
Source: Royal Society of Chemistry journal article supplement (doi:10.1039/c1jm10341e), 2011-01-01
Supplement: c1jm10341e.pdf [file c1jm10341e.pdf]

## Electronic supplementary information

### **Polyethylenimine-Functionalized Graphene Oxide as an Efficient Gene Delivery Vector**

*Biao Chen,<sup>1,2</sup> Min Liu,<sup>2</sup> Liming Zhang,<sup>2</sup> Jie Huang,<sup>2</sup> Jianlin Yao<sup>1\*</sup> and Zhijun Zhang<sup>2\*</sup>*

<sup>1</sup>College of Chemistry, Chemical Engineering and Materials Science, Soochow University, Suzhou 215123, P. R. China

<sup>2</sup>Division of Nanobiomedicine, Suzhou Institute of Nano-tech and Nano-bionics, Chinese Academy of Sciences, Suzhou, 215123, P. R. China

\*Corresponding authors.

Jianlin Yao, Fax: 86-0512-65880089. Tel: 86-0512-65880358.

Email: [jlyao@suda.edu.cn](mailto:jlyao@suda.edu.cn)

Zhijun Zhang, Fax: 86-0512-62603079. Tel: 86-0512-62872556.

E-mail: [zjzhang2007@sinano.ac.cn](mailto:zjzhang2007@sinano.ac.cn)

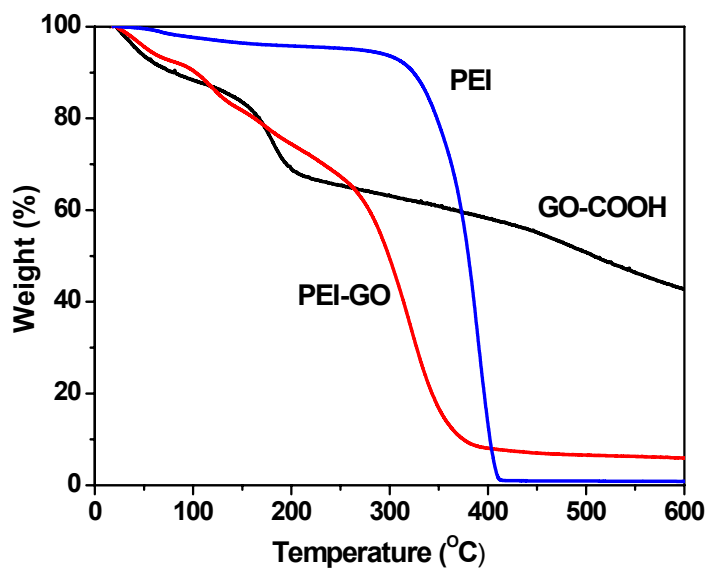

**Fig. S1** TGA curves of GO-COOH, PEI-GO and PEI.

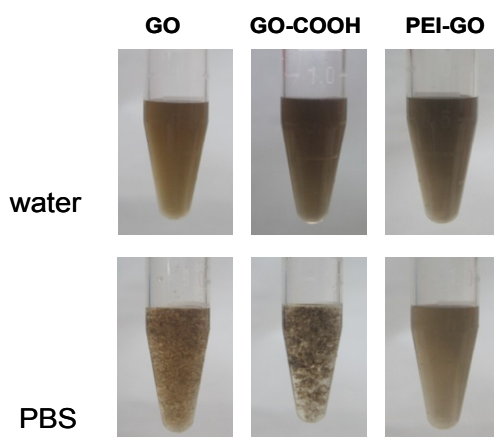

**Fig. S2** Photographs of GO, GO-COOH and PEI-GO in water and PBS buffer, respectively.
